# Supplementary material
Source: PubMed Central journal article supplement (PMC2706497)
Supplement: NIHMS86630-supplement-1_si_001.pdf [file NIHMS86630-supplement-1_si_001.pdf]

**Structural and Mechanistic Studies of Mofegiline Inhibition of Recombinant Human Monoamine  
Oxidase B**

*Erika M. Milczek, Daniele Bonivento, Claudia Binda, Andrea Mattevi, Ian A. McDonald, and Dale E.  
Edmondson*

**Supporting Information**

**Table of Contents**

|                                                                      |    |
|----------------------------------------------------------------------|----|
| Competitive inhibition data for mofegiline inhibition of human MAO-B | S2 |
| Competitive inhibition data for mofegiline inhibition of human MAO-A | S3 |

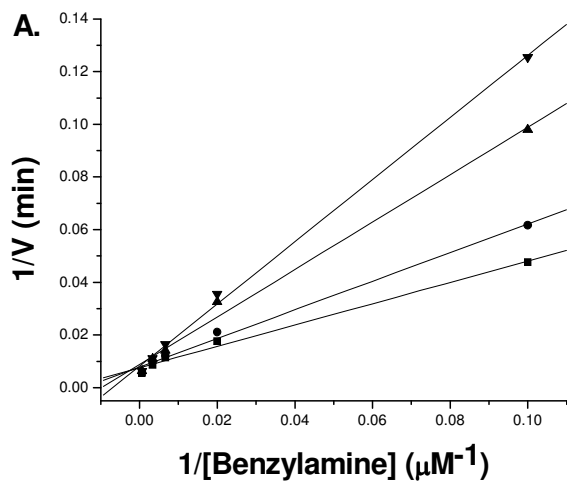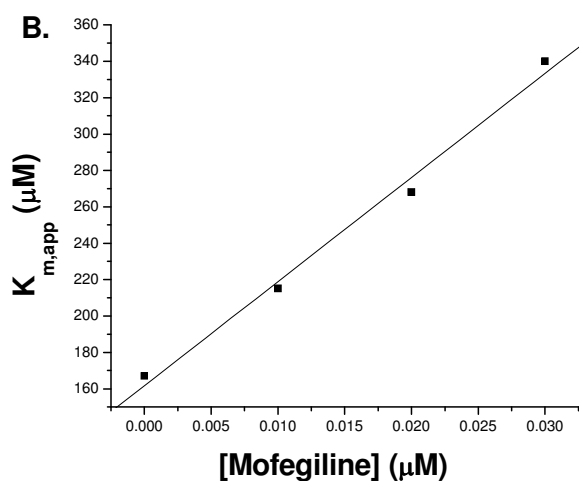

**Figure S1.** Mofegiline is a competitive inhibitor of human MAO-B. **A.** The activity of MAO-B was assayed at varied concentrations of benzylamine with a constant inhibitor concentration of: (■) 0  $\mu\text{M}$  of mofegiline, (●) 0.01  $\mu\text{M}$  of mofegiline, (▲) 0.02  $\mu\text{M}$  of mofegiline, (▼) 0.03  $\mu\text{M}$  of mofegiline. **B.** The inhibitor concentration was plotted as a function of apparent  $K_m$  for the determination of the inhibition constant.

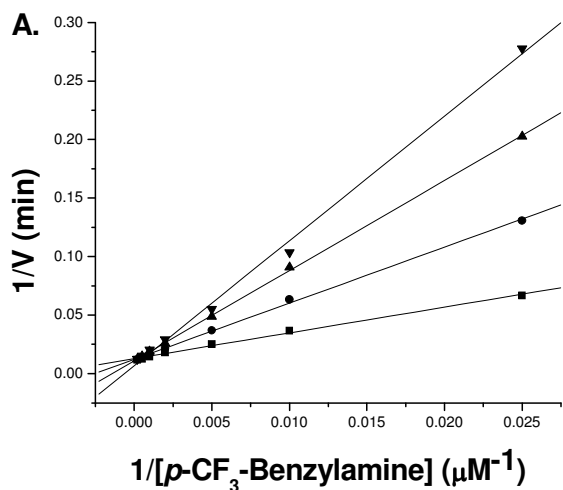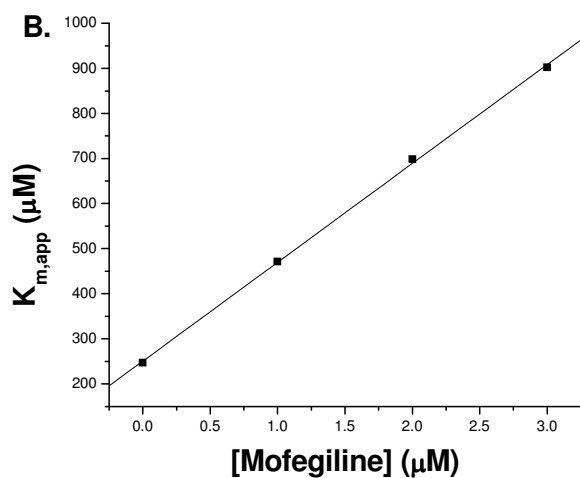

**Figure S2.** Mofegiline is a competitive inhibitor of human MAO-A. **A.** The activity of MAO-A was assayed at varied concentrations of  $p\text{-CF}_3\text{-benzylamine}$  with a constant inhibitor concentration of: (■) 0  $\mu\text{M}$  of mofegiline, (●) 1  $\mu\text{M}$  of mofegiline, (▲) 2  $\mu\text{M}$  of mofegiline, (▼) 3  $\mu\text{M}$  of mofegiline. **B.** The inhibitor concentration was plotted as a function of apparent  $K_m$  for the determination of the inhibition constant.
